# Supplementary material for: Cohesin-dependent regulation of Runx genes
Source: Oxford University Press journal article supplement (doi:10.1242/dev.002485), 2007-06-14
Supplement: dev002485tables1.pdf [file dev002485tables1.pdf]

**Table S1. Homozygous *rad21*<sup>nz171</sup> embryos are rescued by microinjection of mRNA from zebrafish *rad21* and human *RAD21*, but are not rescued by the zebrafish *rad21*<sup>G277X</sup> mutant mRNA**

| mRNA injected, amount                                       | Rescue read-out                                 | Number of experiments | Number of embryos injected | Number of <i>rad21</i> <sup>nz171</sup> mutants | Number of mutants rescued |
|-------------------------------------------------------------|-------------------------------------------------|-----------------------|----------------------------|-------------------------------------------------|---------------------------|
| Zebrafish <i>rad21</i> , 100 pg                             | Rescue of hematopoietic <i>runx1</i> expression | 3                     | 156                        | 34                                              | 33                        |
|                                                             | Decrease in phosphohistone H3 labeling          | 3                     | 90                         | 18                                              | 15                        |
|                                                             | Morphology                                      | 1                     | 49                         | 12                                              | 11                        |
| Human <i>RAD21</i> , 100 pg                                 | Rescue of hematopoietic <i>runx1</i> expression | 5                     | 254                        | 48                                              | 40                        |
|                                                             | Morphology                                      | 1                     | 57                         | 17                                              | 9                         |
| Zebrafish <i>rad21</i> <sup>G277X</sup> mutant mRNA, 100 pg | Morphology                                      | 1                     | 87                         | 19                                              | 0                         |

Embryos were injected at the 1-cell stage with capped mRNA, and rescue of mutants was scored at 14 somites for *runx1* rescue, 24 h.p.f. for phosphohistone H3 labeling and at 48 h.p.f. for morphology. Partial rescue alone was scored because completely rescued embryos would be indistinguishable from wild-type siblings.
